# Supplementary material for: Identification of Drosophila Gene Products Required for Phagocytosis of Leishmania donovani
Source: PubMed Central journal article supplement (PMC3521716; doi:10.1371/journal.pone.0051831), 2012-12-13

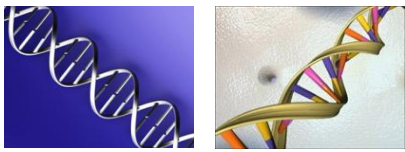

Add one of 1920 dsRNA to each well

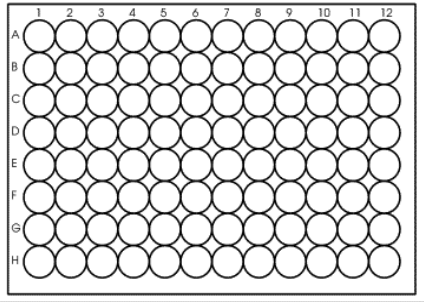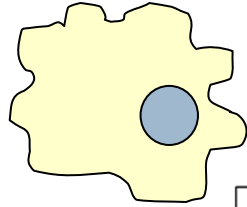

# RNAi Screen

Add S2 cells to each well

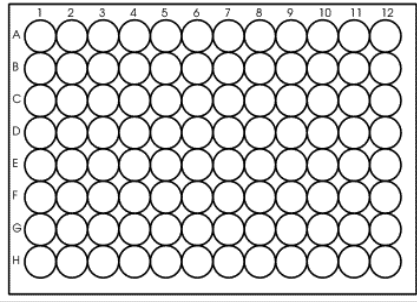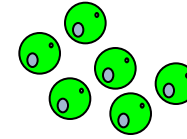

Add *Leishmania* parasites

4 days

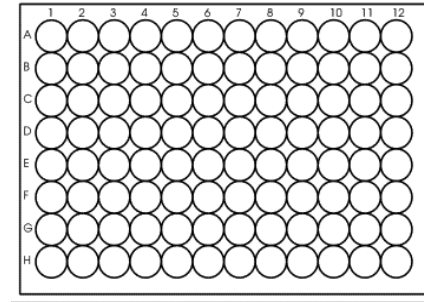

24 hrs

Fix & stain

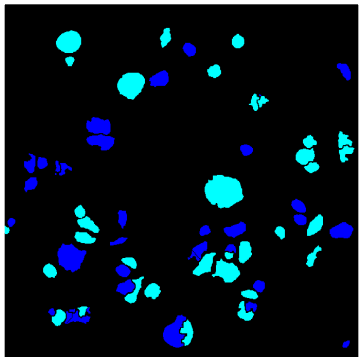

 Infected  
 Uninfected

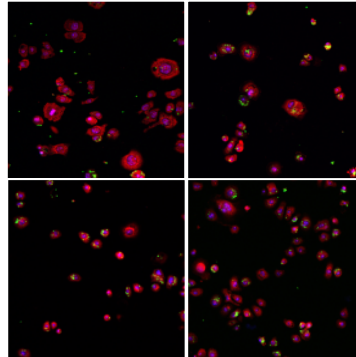

Automated  
microscopy

24,000 images

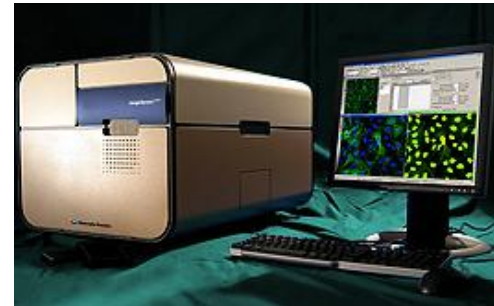

Automated  
image analysis

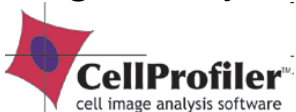

Supplement: pone.0051831.s002.pdf [file pone.0051831.s002.pdf]
